# Supplementary material
Source: PubMed Central journal article supplement (PMC3260554)

Supplementary Figure 2

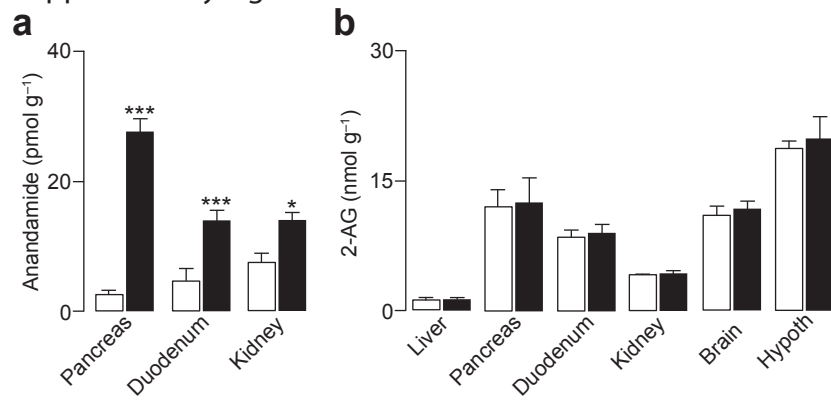

Supplement: NIHMS341209-supplement-Supplementary_Figure_2.pdf [file NIHMS341209-supplement-Supplementary_Figure_2.pdf]

Supplementary Figure 4

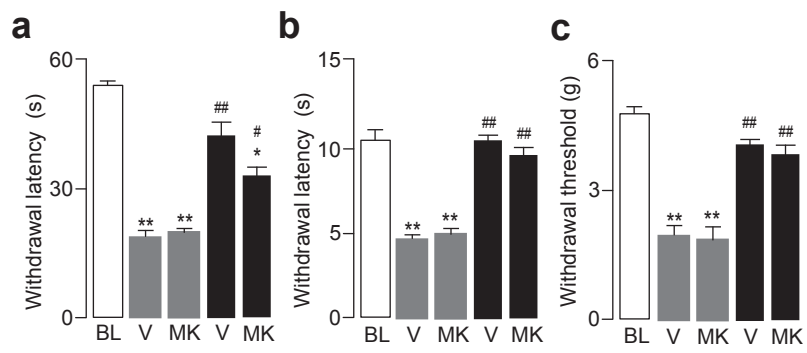

Supplement: NIHMS341209-supplement-Supplementary_Figure_4.pdf [file NIHMS341209-supplement-Supplementary_Figure_4.pdf]

Supplementary Figure 7

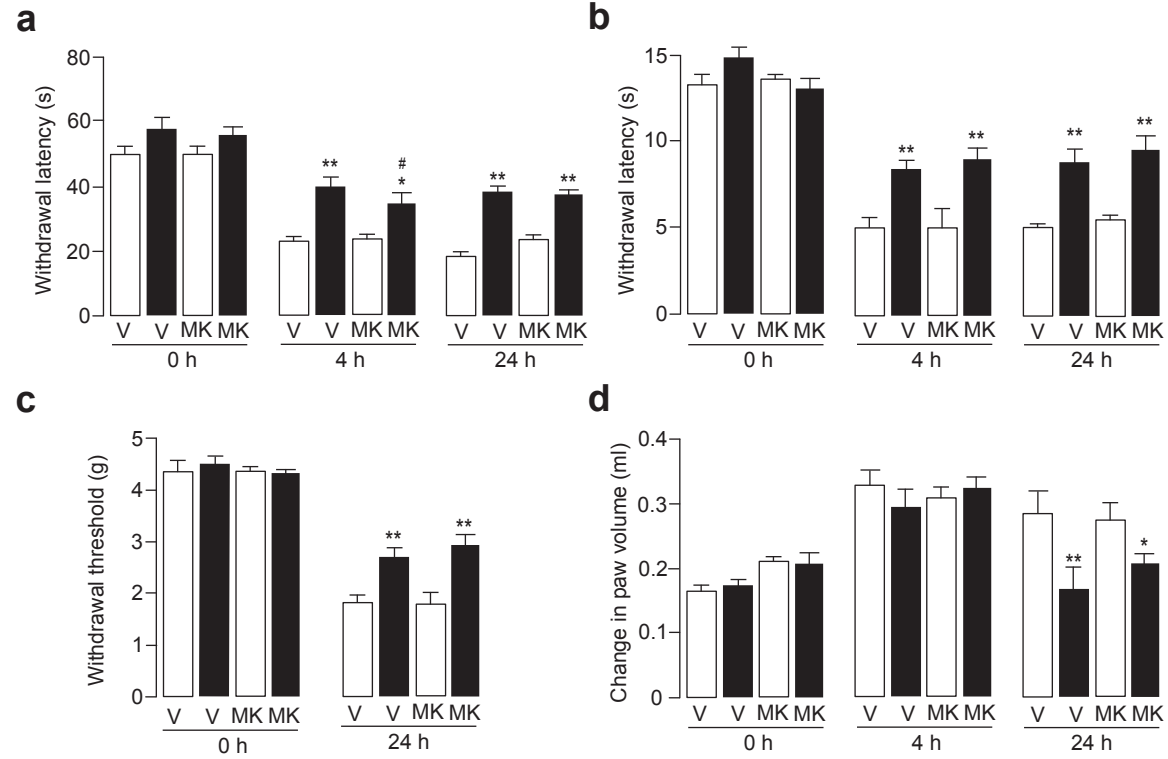

Supplement: NIHMS341209-supplement-Supplementary_Figure_7.pdf [file NIHMS341209-supplement-Supplementary_Figure_7.pdf]
